# Supplementary material
Source: PubMed Central journal article supplement (PMC3877804)
Supplement: supp_tpc.113.116012_tpc116012Supplemental.pdf [file supp_tpc.113.116012_tpc116012Supplemental.pdf]

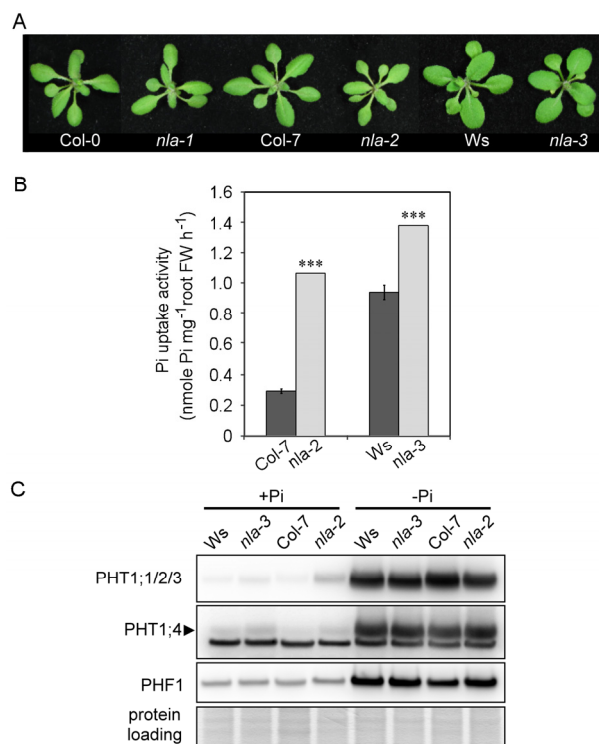

**Supplemental Figure 1.** Mutation in *NLA* Causes Increased Pi Uptake Activity and PHT1 Protein Amounts.

**(A)** Shoot morphology of 19-day-old *nla* mutants under Pi-sufficient conditions.

**(B)** [<sup>33</sup>P]Pi uptake activity of 19-day-old WT and *nla* mutants. N = 8; error bar = SEM; Student's *t* test, mutants versus WT, \*\*\*, P < 0.005. FW, fresh weight; h, hour.

**(C)** Protein expression of PHT1;1/2/3, PHT1;4 and PHF1 in the roots of WT and *nla* mutants under Pi-sufficient (+Pi) and -deficient conditions (-Pi).

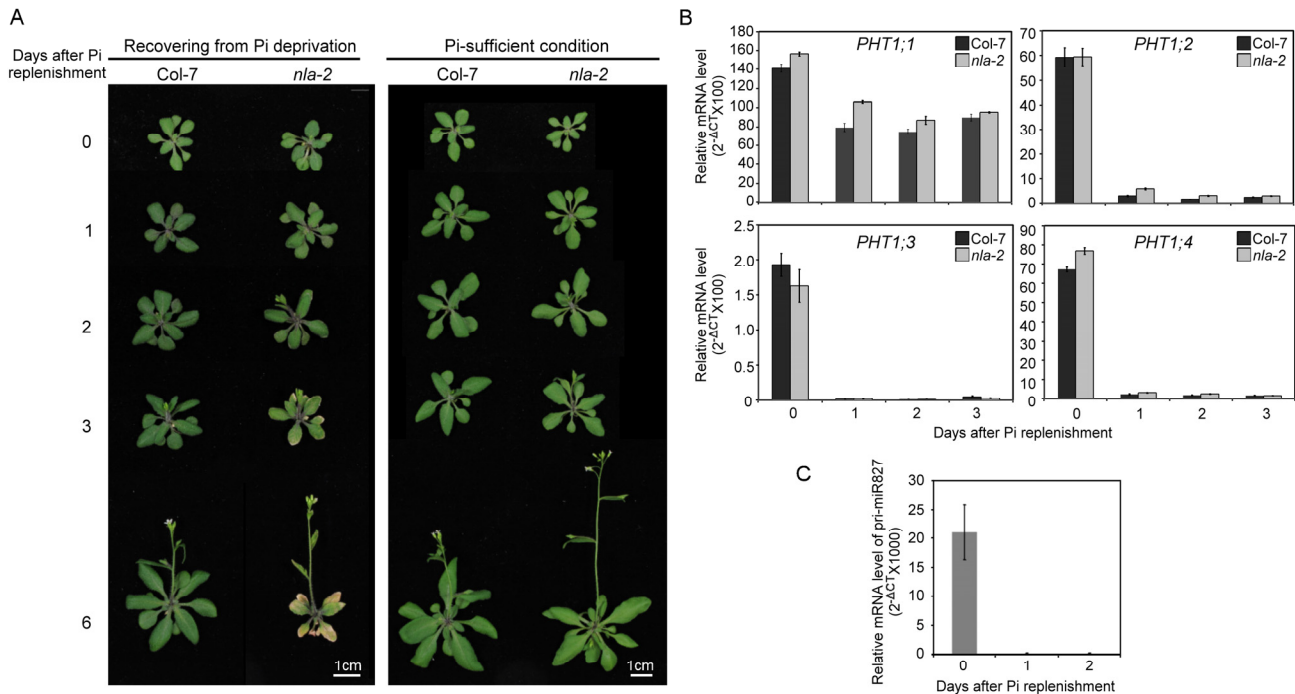

**Supplemental Figure 2.** The Responses of WT and *nla-2* Mutants after Recovery from Pi Deprivation.

**(A)** Shoot morphology of the WT and *nla-2* mutants under Pi-sufficient conditions (right) or after recovery from 4-day Pi deprivation (left). Severe necrosis at leaf edges appeared in the mutants after recovery for 3 days.

**(B)** Expression of *PHT1;1*, *PHT1;2*, *PHT1;3* and *PHT1;4* in the roots of WT and *nla-2* mutants after Pi replenishment. There was no significant difference in mRNA level between the WT and *nla* mutants. N = 3; error bar = SEM.

**(C)** Expression of primary miR827 (pri-miR827) in the WT after Pi replenishment. N = 3; error bar = SEM.

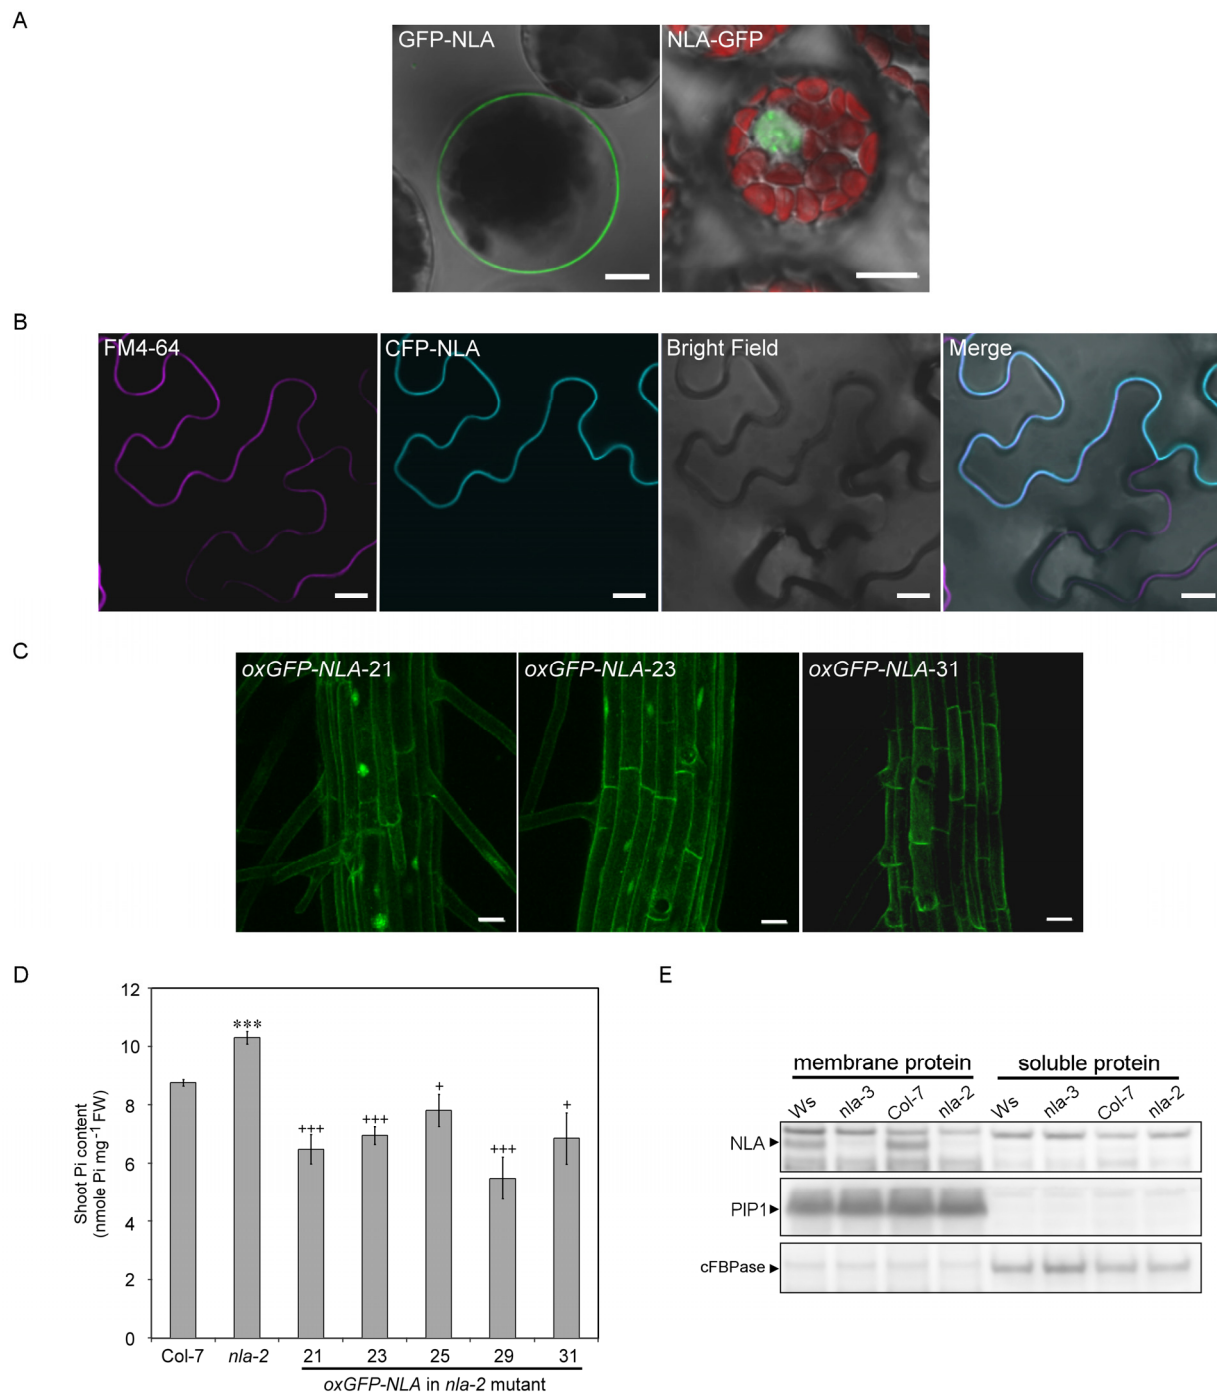

**Supplemental Figure 3. Subcellular Localization of NLA.**

**(A)** Subcellular localization of GFP-NLA or NLA-GFP in Arabidopsis mesophyll protoplasts. Bar = 20  $\mu$ m.

**(B)** Colocalization of CFP-NLA with FM4-64 at the PM after staining for 15 minutes. Bar = 10  $\mu$ m.

**(C)** Subcellular localization of GFP-NLA in 3 independent *nla-2* lines (12-day-old) overexpressing GFP-NLA. Bar = 20  $\mu$ m.

**(D)** Pi content of overexpressing GFP-NLA in 12-day-old *nla-2* mutants grown in high Pi medium. N = 3; error bar = SEM; Student's *t* test, *nla-2* mutants versus WT, \*\*\*, P < 0.005; overexpressing lines versus *nla-2*, +, P < 0.05; +++, P < 0.005. FW, fresh weight.

**(E)** NLA proteins were detected only in the membrane protein fraction and not in the soluble protein fraction. PIP1, cFBPase and PHF1 were used as markers for PM proteins, cytosolic proteins and ER proteins, respectively.

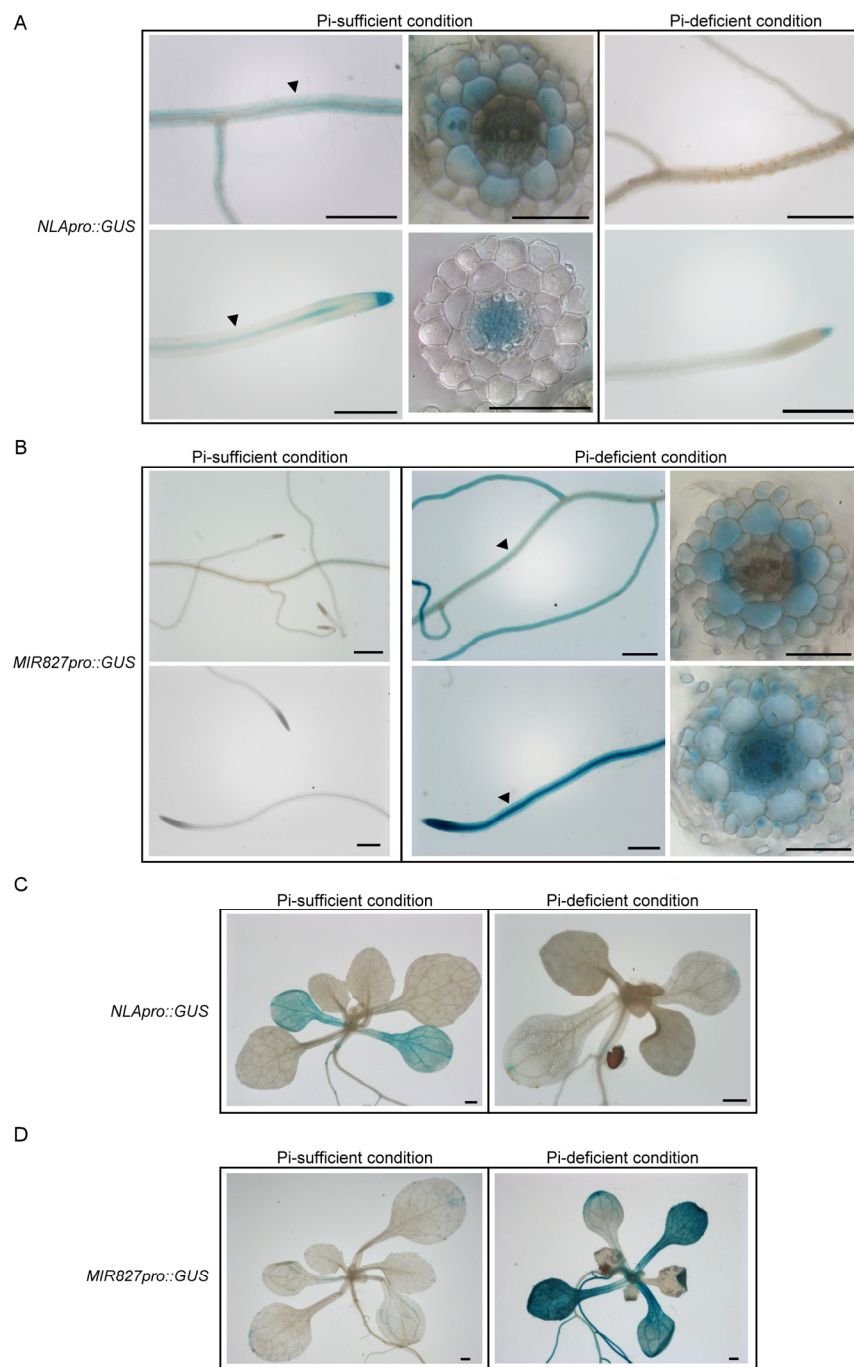

**Supplemental Figure 4.** Expression Pattern of *NLA* and *MIR827*.

GUS staining of roots of 12-day-old seedlings for examining the expression pattern of *NLA* (**A**) and *MIR827* (**B**). The cross sections of roots were from the areas marked with arrowheads in the left panels.

Expression pattern of *NLA* and *MIR827* in shoots are shown in (**C**) and (**D**), respectively. Bar = 50  $\mu$ m. Six independent transgenic lines of each construct were examined. Representative lines are shown.

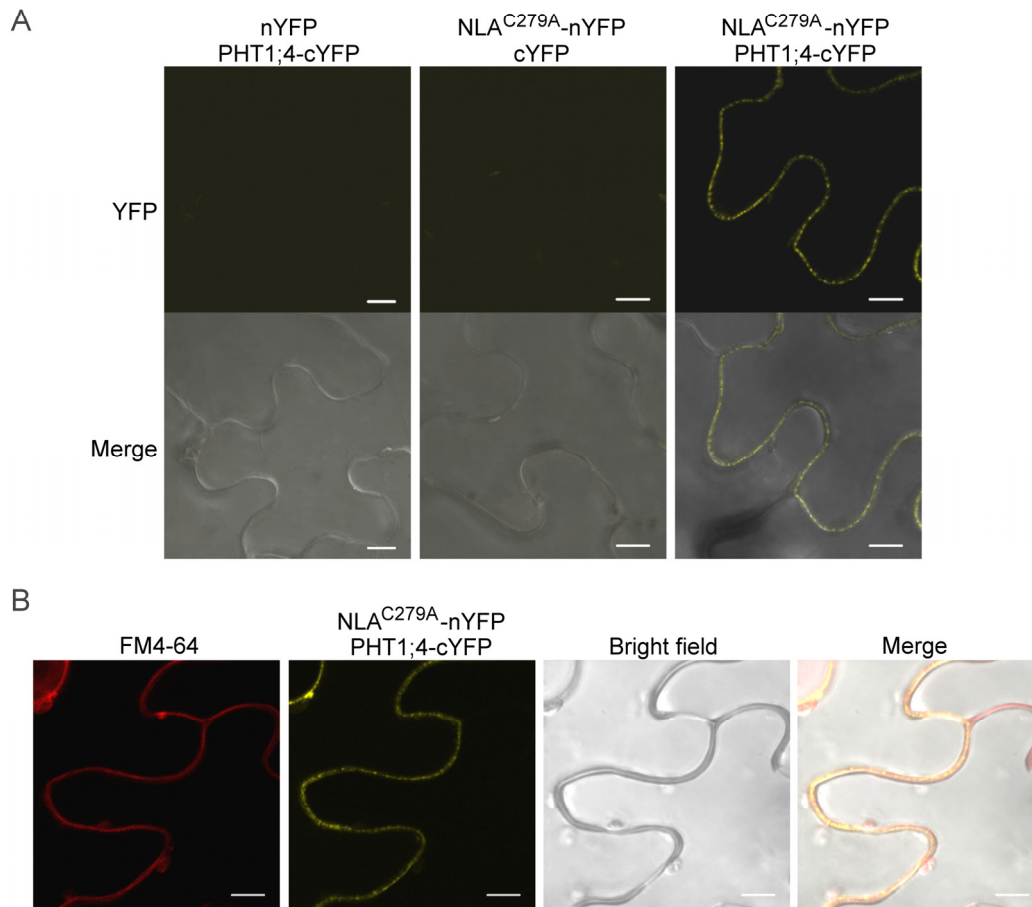

**Supplemental Figure 5.** Analysis of Protein-Protein Interaction between NLA and PHT1;4.

Coexpression of PHT1;4-cYFP with NLA<sup>C279A</sup>-nYFP in the tobacco leaves shown BiFC fluorescence in the PM (**A**) which was colocalized with FM4-64 after staining for 15 minutes (**B**). The “merge” panel is an overlaid image of YFP and bright field (**A**) or YFP, FM4-64 and bright field (**B**).

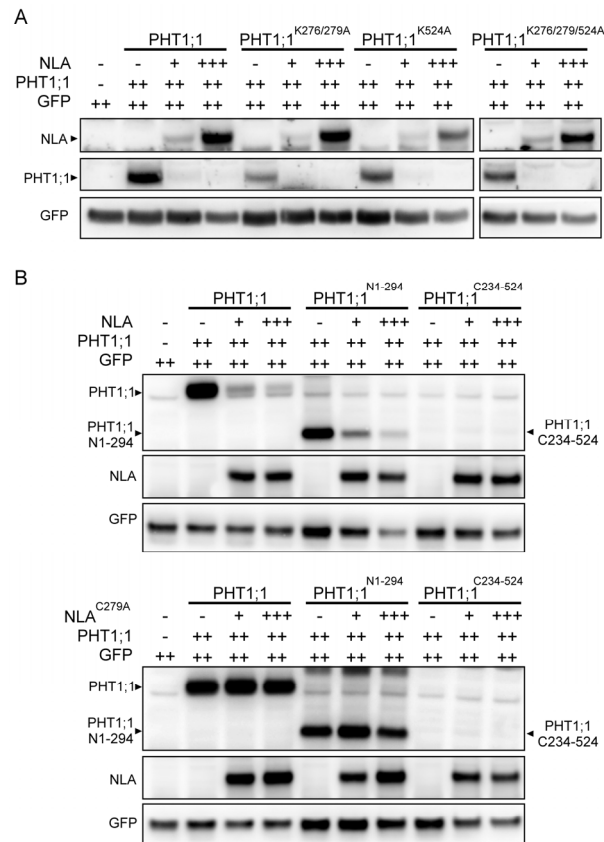

**Supplemental Figure 6.** The N-terminal Portion of PHT1;1 Is Sufficient for NLA-Mediated Degradation.

**(A)** None of the mutated PHT1;1 proteins (PHT1;1<sup>K524A</sup>, PHT1;1<sup>K276/279A</sup>, PHT1;1<sup>K276/279/524A</sup>) were resistant to NLA-mediated degradation when coexpressed with NLA in tobacco leaves.

**(B)** Coexpression of N- (PHT1;1<sup>N1-294</sup>) or C- (PHT1;1<sup>C234-524</sup>) terminal portion of PHT1;1 with NLA or NLA<sup>C279A</sup> in tobacco leaves. PHT1;1<sup>N1-294</sup> was degraded by NLA but not by NLA<sup>C279A</sup>. The signal of PHT1;1<sup>C234-524</sup> was too weak to be conclusive.

Microsomal proteins were used for this experiment. PHT1;1 and its mutated and truncated forms were detected by anti-PHT1;1/2/3 antibodies. Co-infiltration of 35S::GFP construct was used as an internal control. Note that "+++" and "++" denotes 5- and 2.5-fold increases in volume of infiltration relative to "+", respectively.

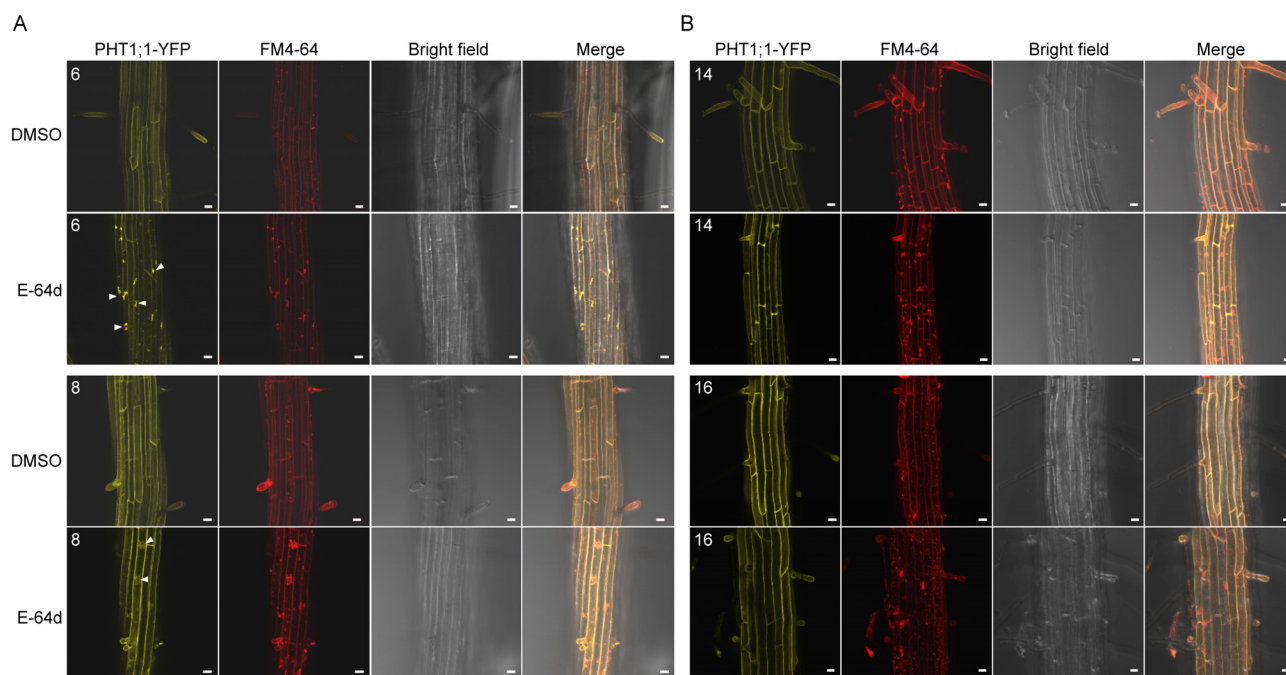

**Supplemental Figure 7.** NLA-Mediated Ubiquitination Triggers PHT1;1 Sorting into the Vacuole through the Endosomal Trafficking Pathway.

The effect of E-64d treatment on PHT1;1-YFP trafficking in two additional independent transgenic lines, #6 and #8 in the WT background (A) and #14 and #16 in *nla-2* mutants (B). The “merge” panel is an overlaid image of YFP, FM4-64 and bright field. The aggregation of PHT1;1-YFP in the WT (A) is indicated by arrowheads. Bar = 20  $\mu$ m.

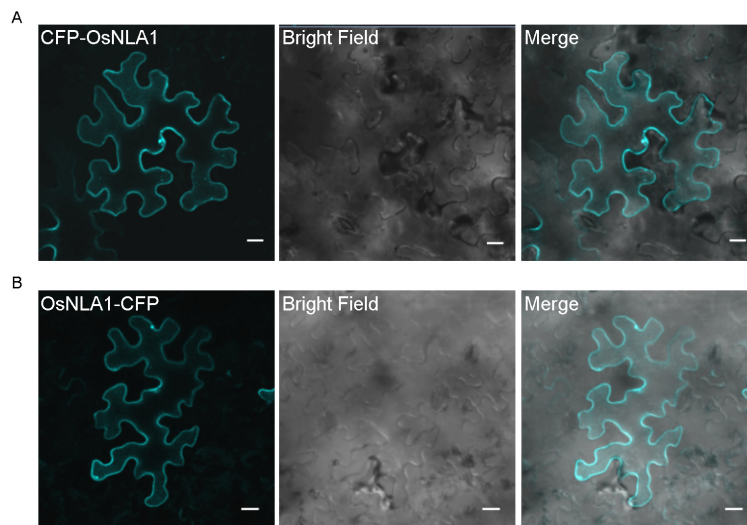

**Supplemental Figure 8.** Subcellular localization of Os-NLA1. Subcellular localization of CFP-OsNLA1 (**A**) and OsNLA1-CFP (**B**) in tobacco leaves. The “merge” panel is an overlaid image of CFP and bright field. Bar = 20  $\mu$ m.



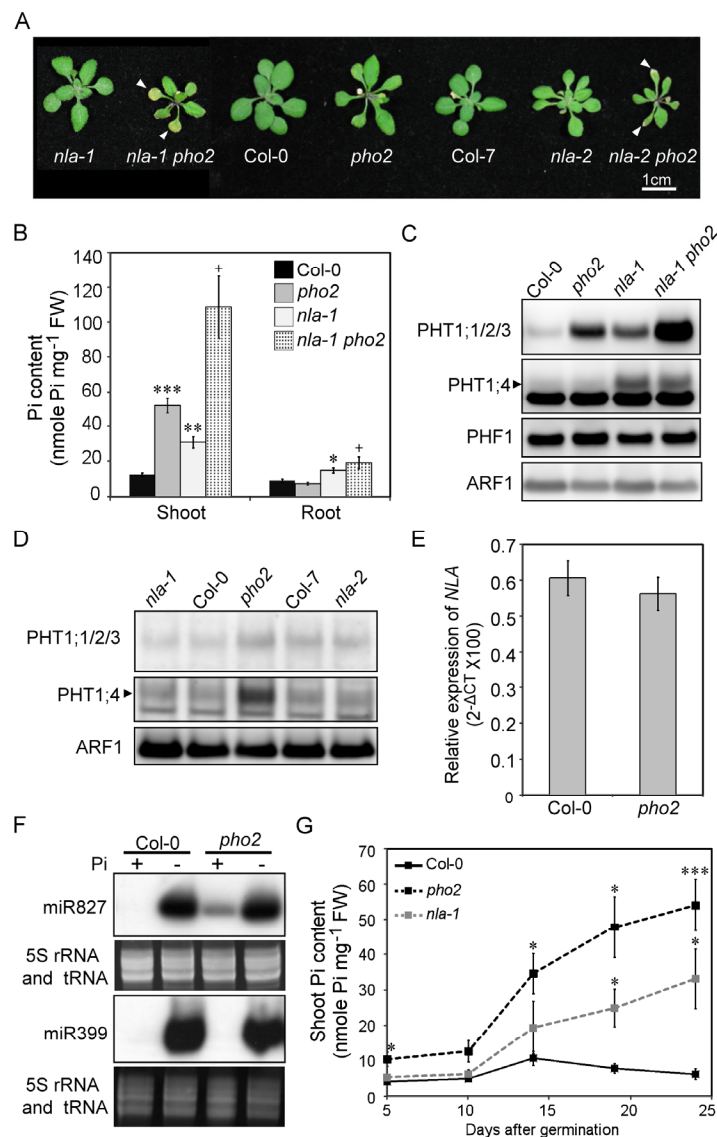

**Supplemental Figure 9.** The Difference between NLA- and PHO2-Dependent Regulation of PHT1s.

**(A)** The leaf phenotype of 19-day-old *nla pho2* double and respective single mutants. The necrosis (arrowhead) was clearly observed at the leaf edge of double mutants.

The Pi content **(B)** and protein expression of PHT1;1/2/3, PHT1;4 and PHF1 **(C)** in *nla-1 pho2* double and the respective single mutants. N = 3; error bar = SEM. Student's *t* test, single mutants versus WT, \*, P < 0.05; \*\*, P < 0.01; \*\*\*, P < 0.005; *nla-1 pho2* versus *pho2*, +, P < 0.05. FW, fresh weight. The detection of ARF1 was used as a loading control.

**(D)** Immunoblot analysis of PHT1;1/2/3 and PHT1;4 in 10-day-old mutants and the corresponding WT. The detection of ARF1 was used as a loading control.

**(E)** The mRNA expression of *NLA* in 19-day-old WT and *pho2* plants. There was no significant difference of *NLA* expression between WT and *pho2* mutants. N = 3; error bar = SEM.

**(F)** Expression of mature miR827 and miR399 in the roots of 19-day-old WT and *pho2* plants.

**(G)** The Pi content of *nla-1* and *pho2* mutants during plant growth. N = 3, error bar = SEM. Student's *t* test, single mutants versus WT, \*, P < 0.05; \*\*\*, P < 0.005. FW, fresh weight.

**Supplemental Table 1. Sequence of Primers Used in This Study**

| Gene                       | Primer  | Sequence (5'→3')            |
|----------------------------|---------|-----------------------------|
| AT1G02860<br><i>NLA</i>    | Forward | CTTTTTTTTTGTTTGAGGGCTGAAT   |
|                            | Reverse | TCATTTATTTTTCTCTGAATTCACAAC |
| AT2G33770<br><i>PHO2</i>   | Forward | AGGTTTGAAGCTCCACCCTCA       |
|                            | Reverse | CCCAAGATGTGATTGGAGTTCC      |
| AT2G38940<br><i>PHT1;4</i> | Forward | GGTCCCAATAGTTTAGGTGAT       |
|                            | Reverse | AGTTGCTAGAGACAAGGAGAA       |
| AT3G59884<br><i>MIR827</i> | Forward | CCACGAAAGAGTTTGTGATGGT      |
|                            | Reverse | TCCTTGTGTTGATCGATTGGTT      |
| AT5G43350<br><i>PHT1;1</i> | Forward | GCCATGACGAGAAATAATTATGT     |
|                            | Reverse | TAACTTAAGGTCAACGAGCCAAT     |
| AT5G43360<br><i>PHT1;3</i> | Forward | CGAGGCTGAGGTTGATAAATGAT     |
|                            | Reverse | CACACATCGCAAACCAATGAC       |
| AT5G43370<br><i>PHT1;2</i> | Forward | AGCCATCATTGGAGCCTTC         |
|                            | Reverse | ACCTTAGCCTTGTCTTGATT        |
| AT4G05320<br><i>UBQ10</i>  | Forward | GGCCTTGATAATCCCTGATGAATAAG  |
|                            | Reverse | AAAGAGATAACAGGAACGGAACATAGT |

| Construct                                                                                                  | Primer                         | Sequence (5'→3')                                           |
|------------------------------------------------------------------------------------------------------------|--------------------------------|------------------------------------------------------------|
| 35S:: <i>NLA</i><br>35S:: <i>GFP-NLA</i><br>35S:: <i>CFP-NLA</i>                                           | Forward                        | AGCTCCATGAAGTTTTGTAAGAAGT                                  |
|                                                                                                            | Reverse                        | ACCTCGAACTATATCATATTCCAGT                                  |
| 35S:: <i>NLA-GFP</i><br>35S:: <i>NLA-CFP</i>                                                               | Forward                        | AGCTCCATGAAGTTTTGTAAGAAGT                                  |
|                                                                                                            | Reverse                        | TATCCAGTGAAGCTTCGGCA                                       |
| 35S:: <i>NLA</i> <sup>C279A</sup><br>35S:: <i>CFP-NLA</i> <sup>C279A</sup>                                 | Forward                        | GCCCGTGAGGATGGGGTTTATAAAGGTGC                              |
|                                                                                                            | Reverse                        | AAGCGGGCATTTCAGTTGCTTCTGCG                                 |
| 35S:: <i>CFP-NLA</i> <sup>SPX</sup>                                                                        | Forward                        | AGCTCCATGAAGTTTTGTAAGAAGT                                  |
|                                                                                                            | Reverse                        | TCAAGAGAGCTCGCAGGAAAG                                      |
| 35S:: <i>NLA</i> <sup>SPX</sup> - <i>CFP</i><br><i>UBQ<sub>pro</sub>::NLA</i> <sup>SPX</sup> - <i>nYFP</i> | Forward                        | AGCTCCATGAAGTTTTGTAAGAAGT                                  |
|                                                                                                            | Reverse                        | AGAGAGCTCGCAGGAAAG                                         |
| 35S:: <i>CFP-NLA</i> <sup>RING</sup>                                                                       | Forward                        | ATGAAAATGCGAATAGAAATC                                      |
|                                                                                                            | Reverse                        | ACCTCGAACTATATCATATTCCAGT                                  |
| 35S:: <i>NLA</i> <sup>RING</sup> - <i>CFP</i>                                                              | Forward                        | ATGAAAATGCGAATAGAAATC                                      |
|                                                                                                            | Reverse                        | TATCCAGTGAAGCTTCGGCA                                       |
| 35S:: <i>PHT1;1</i>                                                                                        | Forward                        | ATGGCCGAACAACAACACTAGGAGT                                  |
|                                                                                                            | Reverse                        | TTATTTCTCGTCATGGCTAACCTC                                   |
| <i>UBQ<sub>pro</sub>::PHT1;1-cYFP</i>                                                                      | Forward                        | ATGGCCGAACAACAACACTAGGAGT                                  |
|                                                                                                            | Reverse                        | TTTCTCGTCATGGCTAACCTCA                                     |
| <i>PHT1;1<sub>pro</sub>::PHT1;1-YFP</i>                                                                    | Pro-for                        | CCCGGTCTAGGGACGTCCAAGTTCACTGAAT                            |
|                                                                                                            | P2                             | CACAGCTCCACCTCCACCTCCAGGCCGCCAGAGAGTTCTTCAAGGGACTT<br>GCCT |
|                                                                                                            | FP-for                         | GGCCGGCCTGGAGGTGGAGGTGGAGCTGTGAGCA                         |
|                                                                                                            | FP-rev                         | GGCCCAGCGGCCGCAGCAGCACCAGCAGGATC                           |
|                                                                                                            | P3                             | TGCTGGTGTGCTGCTGCGGCCGCTGGGGCCGGTGAGGCTGAGGTTAGCCATG       |
| P4                                                                                                         | CGAAATATTAGACAAGATTTAAATGATATC |                                                            |

**Supplemental Table 1. Sequence of Primers used in This Study (Continued)**

| Construct                                | Primer  | Sequence (5'→3')                                              |
|------------------------------------------|---------|---------------------------------------------------------------|
| 35S::PHT1;1-YFP                          | P1      | ATGGCCGAACAACAAGTAGGAGT                                       |
|                                          | P2      | CACAGCTCCACCTCCACCTCCAGGCCGGCCAGAGAGTTCTTCAAGGGACTT<br>GCCT   |
|                                          | FP-for  | GGCCGGCCTGGAGGTGGAGGTGGAGCTGTGAGCA                            |
|                                          | FP-rev  | GGCCCCAGCGGCCGCAGCAGCACCAGCAGGATC                             |
|                                          | P3      | TGCTGGTGTCTGCTGCGGCCGCTGGGGCCGGTGAGGCTGAGGTTAGCCATG           |
|                                          | P4      | CGAAATATTAGACAAGATTTAAATGATATC                                |
| 35S::PHT1;4                              | Forward | ATGGCAAGGGAACAATTACAAGTG                                      |
|                                          | Reverse | CTAAACTATTGGGACCGTTCTACTATCA                                  |
| UBQ <sub>pro</sub> ::PHT1;4-cYFP         | Forward | ATGGCAAGGGAACAATTACAAGTG                                      |
|                                          | Reverse | AACTATTGGGACCGTTCTACTATCATT                                   |
| 35S::PHT1;4-YFP                          | P1      | ATGGCAAGGGAACAATTACAAGTG                                      |
|                                          | P2      | CACAGCTCCACCTCCACCTCCAGGCCGGCCGCTATTCTCATTGTCTTCATTTT<br>CACC |
|                                          | FP-for  | GGCCGGCCTGGAGGTGGAGGTGGAGCTGTGAGCA                            |
|                                          | FP-rev  | GGCCCCAGCGGCCGCAGCAGCACCAGCAGGATC                             |
|                                          | P3      | TGCTGGTGTCTGCTGCGGCCGCTGGGGCCAACAATGATAGTAGAACGGTCCC          |
|                                          | P4      | GGTCAATTACGAAGGAGAGCCTTCTACTT                                 |
| 35S::PHT1;1-HA                           | Forward | ATGGCCGAACAACAAGTAGGAGT                                       |
|                                          | Reverse | TTAAGCGTAATCTGGAACATCGTATGGGTATTTCTCGTCATGGCTAAC              |
| 35S::PHT1;1 <sup>K524A</sup> -HA         | Forward | GCATACCATACGATGTTCCAGATTACGCT                                 |
|                                          | Reverse | CTCGTCATGGCTAACCTCAGCCTCAC                                    |
| 35S::PHT1;1 <sup>K276/279A</sup> -HA     | Forward | GACCCCGCACAAAATATGGCTTGTCTCC                                  |
| 35S::PHT1;1 <sup>K276/279/524A</sup> -HA | Reverse | TGCGACGTCATCCTCCACCCTTCTCAAG                                  |
| 35S::OsNLA1                              | Forward | ATGAAGTTTGCCAAGAAGTAC                                         |
| 35S::CFP-OsNLA1                          | Reverse | TCACATGCCCAAGAATGCC                                           |
| 35S::OSNLA1-CFP                          | Forward | ATGAAGTTTGCCAAGAAGTAC                                         |
|                                          | Reverse | CATGCCCAAGAATGCCCTG                                           |
| UBQ <sub>pro</sub> ::IRT1-cYFP           | Forward | ATGGCTTCAAATTCAGCAC                                           |
|                                          | Reverse | GCGGCCGCTTAAGCCATTTGGCGATAA                                   |
| MIR827 <sub>pro</sub> ::GUS              | Forward | CACTATGTTAAACTCAGCTT                                          |
|                                          | Reverse | ACCTATAACGTTTCATGGAAGT                                        |
| NLA <sub>pro</sub> ::GUS                 | Forward | AGCCAAATAGGTATTAGTCT                                          |
|                                          | Reverse | GAACATATCTTCTTCTCGT                                           |
| pDL-Nub-NLA <sup>SPX</sup>               | Forward | CGCTGGATCCATGAAGTTTGTGAAGAAGT                                 |
|                                          | Reverse | TCAAGAGAGCTCGCAGGAAAG                                         |
| pTMV4-PHT1;4-Cub                         | Forward | ACATCTAGAATGGCAAGGGAACAATTAC                                  |
|                                          | Reverse | TATGTCTAGAAACTATTGGGACCGTTCTAC                                |

Supplemental Table 2. Constructs

| Purpose                                         | Construct                                     | Plasmid backbone       | Insert or PCR product                                     | Template used for cloning            | Cloning method                               |
|-------------------------------------------------|-----------------------------------------------|------------------------|-----------------------------------------------------------|--------------------------------------|----------------------------------------------|
| promoter::reporter assay                        | NLA <sub>pro</sub> ::GUS                      | pMDC164 <sup>1</sup>   | 2.2 kb upstream genomic sequence of NLA from start codon  | Arabidopsis genomic DNA              | Gateway LR                                   |
|                                                 | MIR827 <sub>pro</sub> ::GUS                   | pMDC164 <sup>1</sup>   | 1.3 kb upstream genomic sequence of MIR827 from stem loop | Arabidopsis genomic DNA              | Gateway LR                                   |
| overexpression                                  | 35S::PHT1;1                                   | pMDC32 <sup>1</sup>    | PHT1;1 CDS                                                | TOPO-PHT1;1 CDS                      | Gateway LR                                   |
|                                                 | 35S::PHT1;4                                   | pMDC32 <sup>1</sup>    | PHT1;4 CDS                                                | TOPO-PHT1;4 CDS                      | Gateway LR                                   |
|                                                 | 35S::NLA                                      | pMDC32 <sup>1</sup>    | NLA CDS                                                   | Arabidopsis cDNA                     | Gateway LR                                   |
|                                                 | 35S::NLA <sup>C279A</sup>                     | pMDC32 <sup>1</sup>    | NLA <sup>C279A</sup> CDS                                  | TOPO-NLA CDS                         | site-directed mutagenesis/<br>Gateway LR     |
|                                                 | 35S::OsNLA1                                   | pMDC32 <sup>1</sup>    | OS-NLA1 CDS                                               | rice cDNA                            | Gateway LR                                   |
| HA-tagged PHT1;1 and point-mutated PHT1;1       | 35S::PHT1;1-HA                                | pMDC32 <sup>1</sup>    | PHT1;1-HA                                                 | TOPO-PHT1;1 CDS                      | Gateway LR                                   |
|                                                 | 35S::PHT1;1 <sup>K524A</sup> -HA              | pMDC32 <sup>1</sup>    | <i>PHT1;1<sup>K524A</sup>-HA</i>                          | TOPO-PHT1;1-HA                       | site-directed mutagenesis/<br>Gateway LR     |
|                                                 | 35S::PHT1;1 <sup>K276/279A</sup> -HA          | pMDC32 <sup>1</sup>    | <i>PHT1;1<sup>K276/279A</sup>-HA</i>                      | TOPO-PHT1;1-HA                       | site-directed mutagenesis/<br>Gateway LR     |
|                                                 | 35S::PHT1;1 <sup>K276/279/524A</sup> -HA      | pMDC32 <sup>1</sup>    | <i>PHT1;1<sup>K276/279/524A</sup>-HA</i>                  | TOPO-PHT1;1 <sup>K276/279A</sup> -HA | site-directed mutagenesis/<br>Gateway LR     |
| fluorescent protein-tagged fusion protein       | PHT1;1 <sub>pro</sub> ::PHT1;1-YFP            | pMDC99 <sup>1</sup>    | PHT1;1 genomic DNA & YFP                                  | Arabidopsis genomic DNA and pK7WGY2  | three piece PCR <sup>4</sup> /<br>Gateway LR |
|                                                 | 35S::PHT1;1-YFP                               | pMDC32 <sup>1</sup>    | PHT1;1 CDS & YFP                                          | TOPO-PHT1;1 CDS and pK7WGY2          | three piece PCR <sup>4</sup> /<br>Gateway LR |
|                                                 | 35S::PHT1;4-YFP                               | pMDC32 <sup>1</sup>    | PHT1;4 CDS & YFP                                          | TOPO-PHT1;4 CDS and pK7WGY2          | three piece PCR <sup>4</sup> /<br>Gateway LR |
|                                                 | 35S::GFP-NLA                                  | pK7WGF2 <sup>2</sup>   | NLA CDS                                                   | TOPO-NLA CDS                         | Gateway LR                                   |
|                                                 | 35S::NLA-GFP                                  | pMDC83 <sup>1</sup>    | NLA CDS                                                   | TOPO-NLA CDS                         | Gateway LR                                   |
|                                                 | 35S::CFP-NLA                                  | pK7WGC2 <sup>2</sup>   | NLA CDS                                                   | TOPO-NLA CDS                         | Gateway LR                                   |
|                                                 | 35S::CFP-NLA <sup>C279A</sup>                 | pK7WGC2 <sup>2</sup>   | NLA <sup>C279A</sup> CDS                                  | TOPO-NLA CDS                         | site-directed mutagenesis/<br>Gateway LR     |
|                                                 | 35S::NLA-CFP                                  | pK7CWG2 <sup>2</sup>   | NLA CDS                                                   | TOPO-NLA CDS                         | Gateway LR                                   |
|                                                 | 35S::CFP-NLA <sup>SPX</sup>                   | pK7WGC2 <sup>2</sup>   | NLA <sup>1-220</sup> CDS                                  | TOPO-NLA <sup>SPX</sup>              | Gateway LR                                   |
|                                                 | 35S::CFP-NLA <sup>RING</sup>                  | pK7WGC2 <sup>2</sup>   | NLA <sup>158-335</sup> CDS                                | TOPO-NLA <sup>RING</sup>             | Gateway LR                                   |
|                                                 | 35S::CFP-OsNLA1                               | pK7WGC2 <sup>2</sup>   | Os-NLA1 CDS                                               | TOPO-OsNLA1 CDS                      | Gateway LR                                   |
| bimolecular fluorescence complementation (BiFC) | UBQ <sub>pro</sub> ::NLA-nYFP                 | pUBC-nYFP <sup>3</sup> | NLA CDS                                                   | TOPO-NLA CDS                         | Gateway LR                                   |
|                                                 | UBQ <sub>pro</sub> ::NLA <sup>SPX</sup> -nYFP | pUBC-nYFP <sup>3</sup> | NLA <sup>1-220</sup> CDS                                  | TOPO-NLA <sup>SPX</sup>              | Gateway LR                                   |
|                                                 | UBQ <sub>pro</sub> ::PHT1;1-cYFP              | pUBC-cYFP <sup>3</sup> | PHT1;1 CDS                                                | TOPO-PHT1;1 CDS                      | Gateway LR                                   |
|                                                 | UBQ <sub>pro</sub> ::PHT1;4-cYFP              | pUBC-cYFP <sup>3</sup> | PHT1;4 CDS                                                | TOPO-PHT1;4 CDS                      | Gateway LR                                   |
|                                                 | UBQ <sub>pro</sub> ::CHL1-cYFP                | pUBC-cYFP <sup>3</sup> | CHL1 CDS                                                  | pENTRTM/D-TOPO-CHL1                  | Gateway LR                                   |
|                                                 | UBQ <sub>pro</sub> ::IRT1-cYFP                | pUBC-cYFP <sup>3</sup> | IRT1 CDS                                                  | pDL-NubG-IRT1 (Shin et al., 2013)    | Gateway LR                                   |
| split-ubiquitin yeast-two-hybrid                | pTMBV4-PHT1;4                                 | pTMBV4                 | PHT1;4 CDS                                                | TOPO-PHT1;4 CDS                      | <i>Xba</i> I                                 |
|                                                 | pDL-NubG-NLA <sup>SPX</sup>                   | pDL-NX2                | NLA <sup>1-220</sup> CDS                                  | TOPO-NLA <sup>SPX</sup>              | <i>Bam</i> HI/ <i>Sma</i> I                  |

<sup>1</sup> Curtis, M.D., and Grossniklaus, U. (2003). A gateway cloning vector set for high-throughput functional analysis of genes in planta. *Plant Physiol.* **133**: 462-469.

<sup>2</sup> Karimi, M., Inzé, D., and Depicker, A. (2002). GATEWAY™ vectors for *Agrobacterium*-mediated plant transformation. *Trends Plant Sci.* **7**: 193-195.

<sup>3</sup> Grefen, C., Donald, N., Hashimoto, K., Kudla, J., Schumacher, K., and Blatt, M.R. (2010). A ubiquitin-10 promoter-based vector set for fluorescent protein tagging facilitates temporal stability and native protein distribution in transient and stable expression studies. *Plant J.* **64**: 355-365.

<sup>4</sup> Tian, G.-W., Mohanty, A., Chary, S.N., Li, S., Paap, B., Drakakaki, G., Kopec, C.D., Li, J., Ehrhardt, D., Jackson, D., Rhee, S.Y., Raikhel, N.V., and Citovsky, V. (2004). High-Throughput Fluorescent Tagging of Full-Length Arabidopsis Gene Products in Planta. *Plant Physiol.* **135**: 25-38.

<sup>5</sup> Shin, L.J., Lo, J.C., Chen, G.H., Callis, J., Fu, H., and Yeh, K.C. (2013). IRT1 DEGRADATION FACTOR1, a RING E3 Ubiquitin Ligase, Regulates the Degradation of IRON-REGULATED TRANSPORTER1 in Arabidopsis. *Plant Cell*. PMID: 23995086
